# Supplementary material for: Mesenchymal Phenotype Predisposes Lung Cancer Cells to Impaired Proliferation and Redox Stress in Response to Glutaminase Inhibition
Source: PubMed Central journal article supplement (PMC4264947; doi:10.1371/journal.pone.0115144), 2014-12-12
Supplement: pone.0115144.s001.pdf [file pone.0115144.s001.pdf]

**A****A427**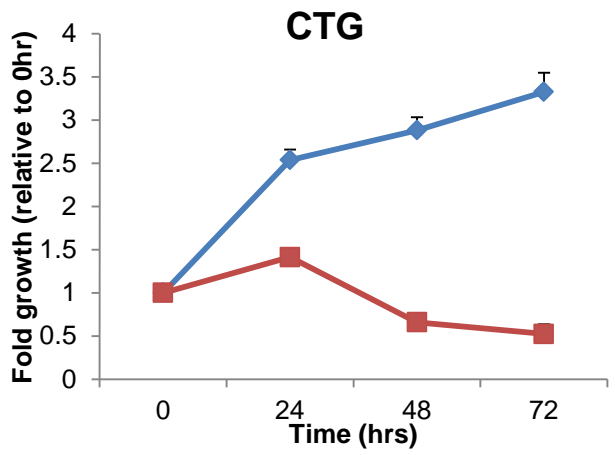**NCI-H1703**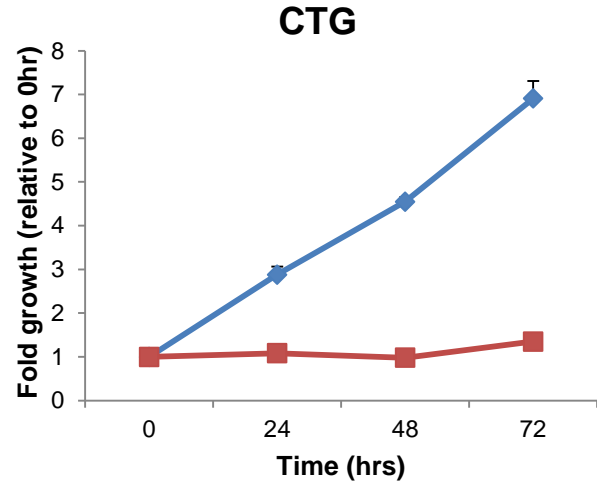**NCI-H1563**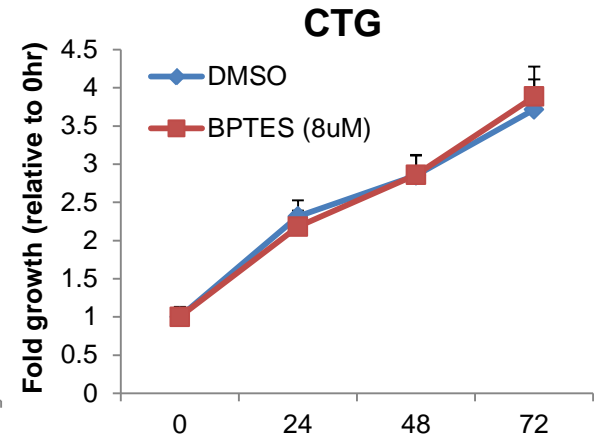**B**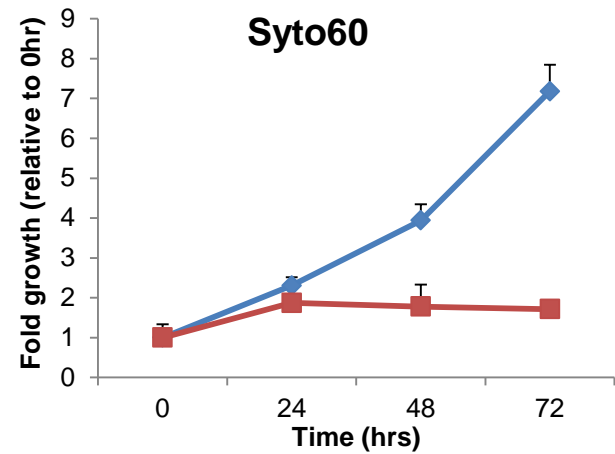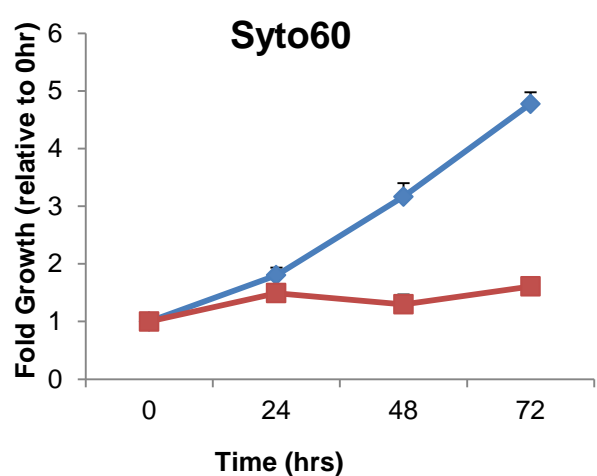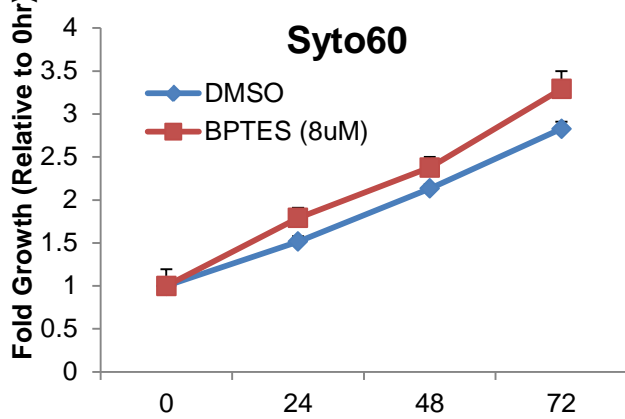**Figure S1**

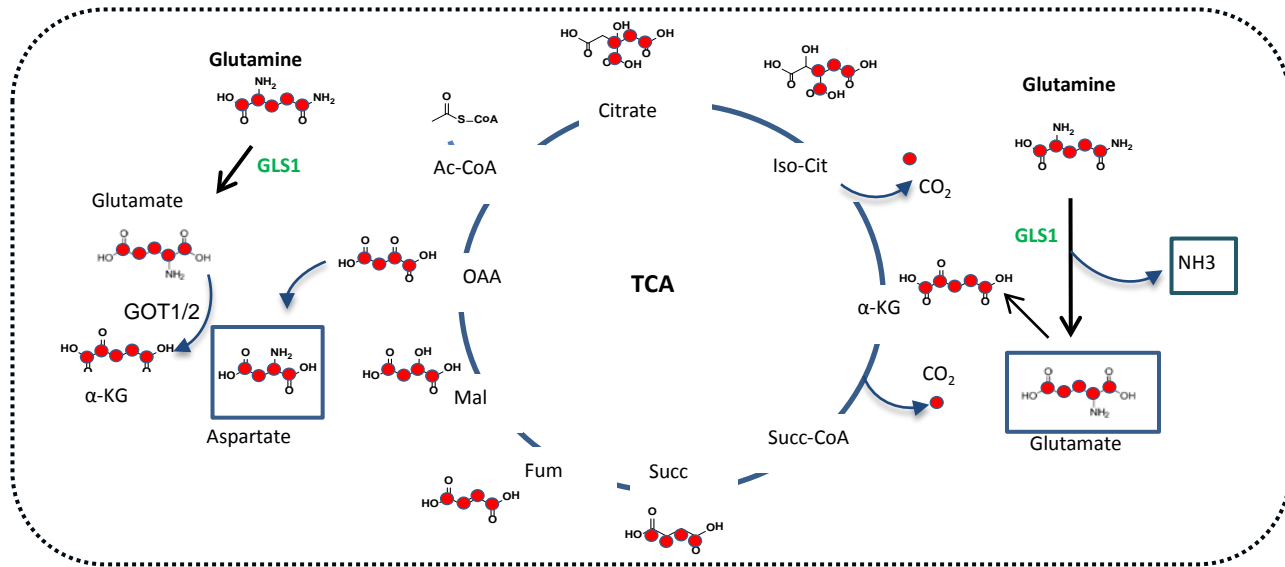

Figure S2

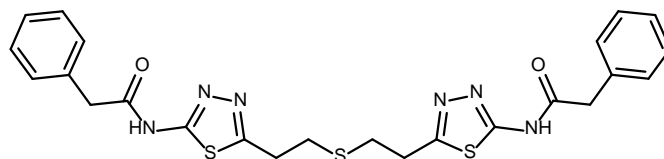

**BPTES**

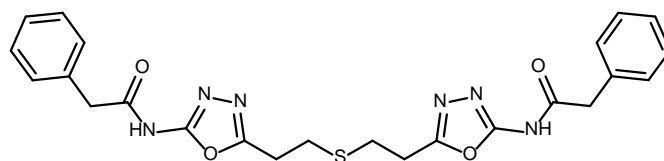

**AGX-4769**

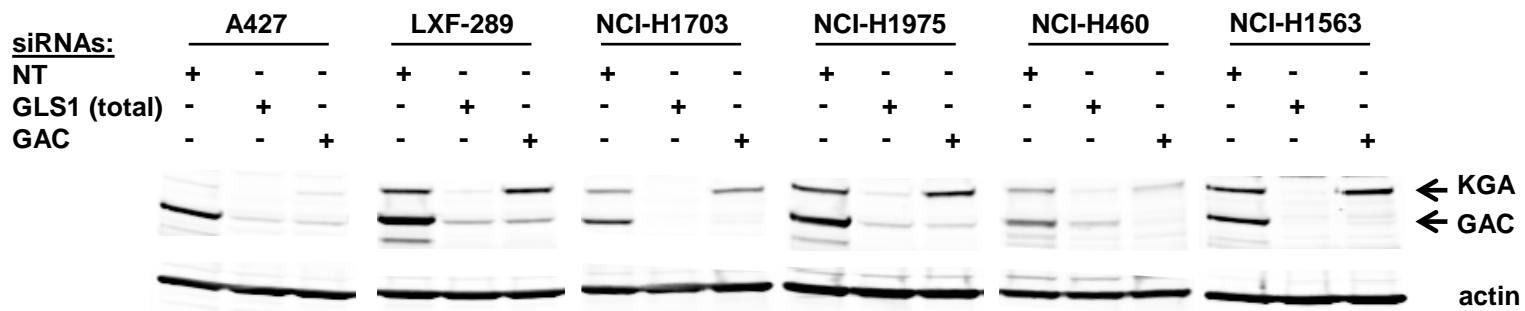

BPTES sensitive

BPTES insensitive

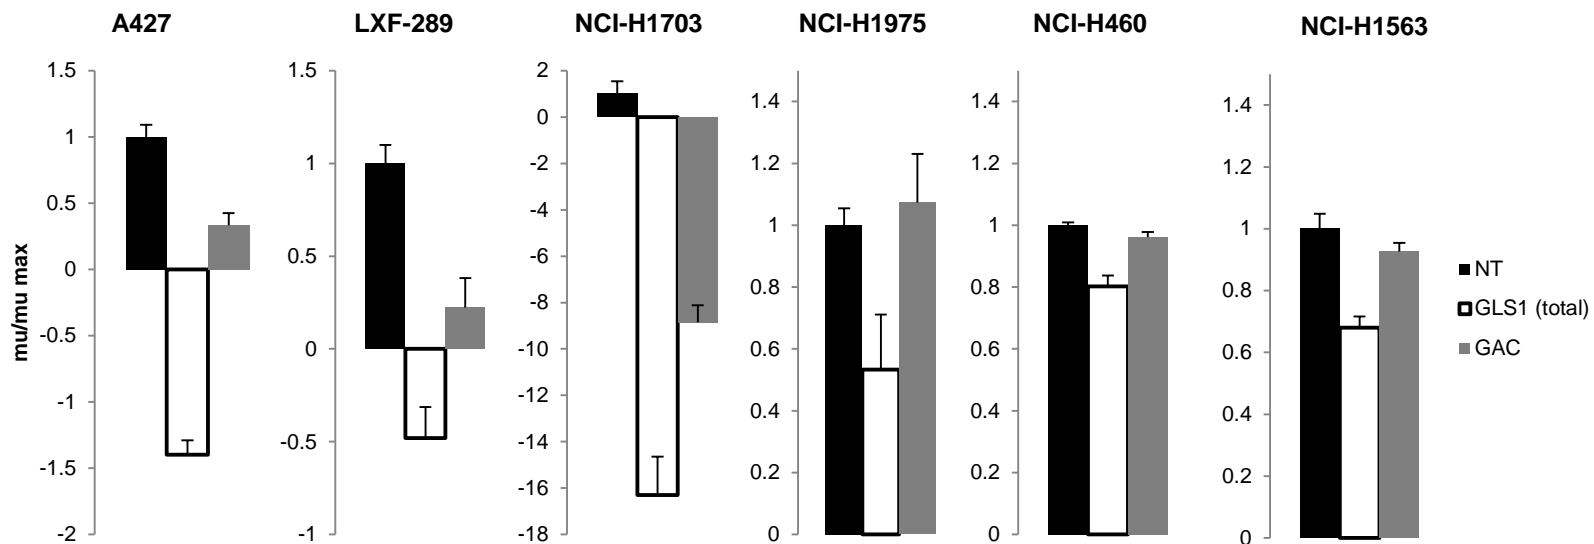

Figure S4

A

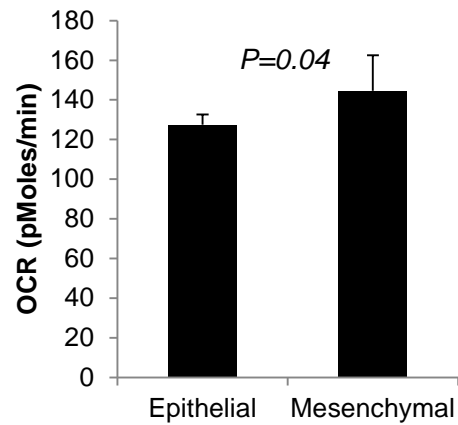

B

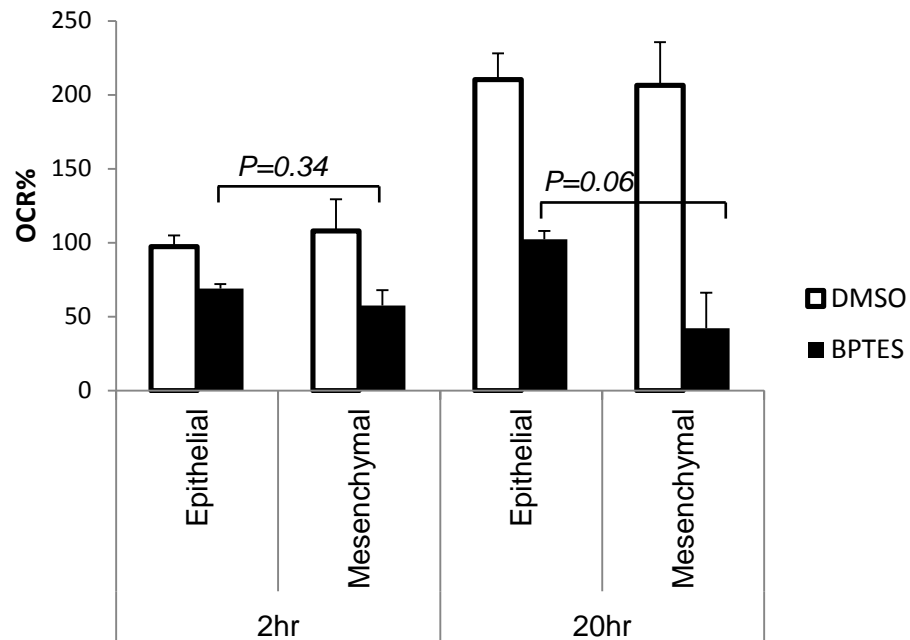

C

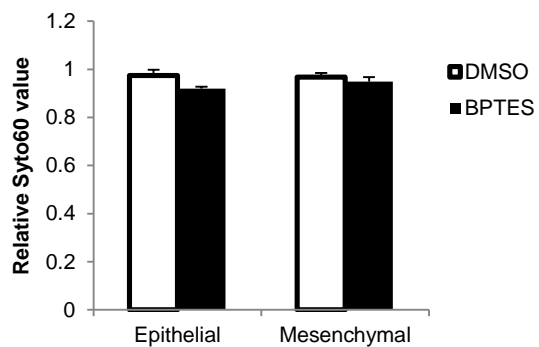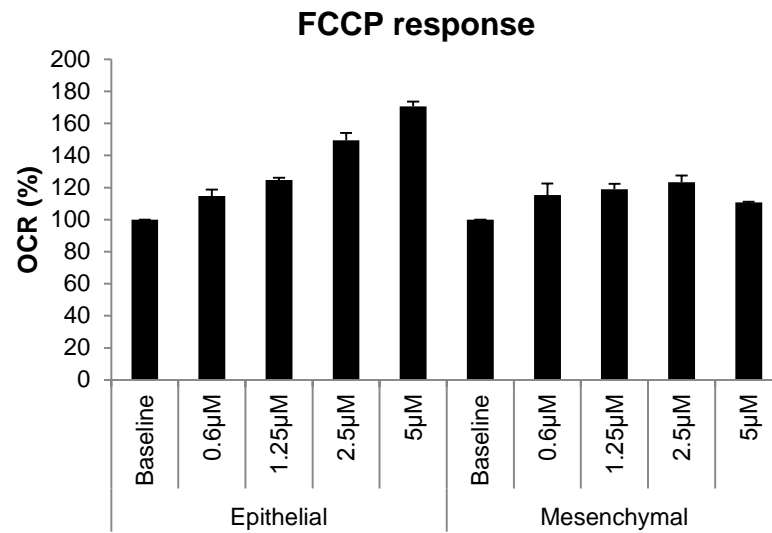

Figure S5

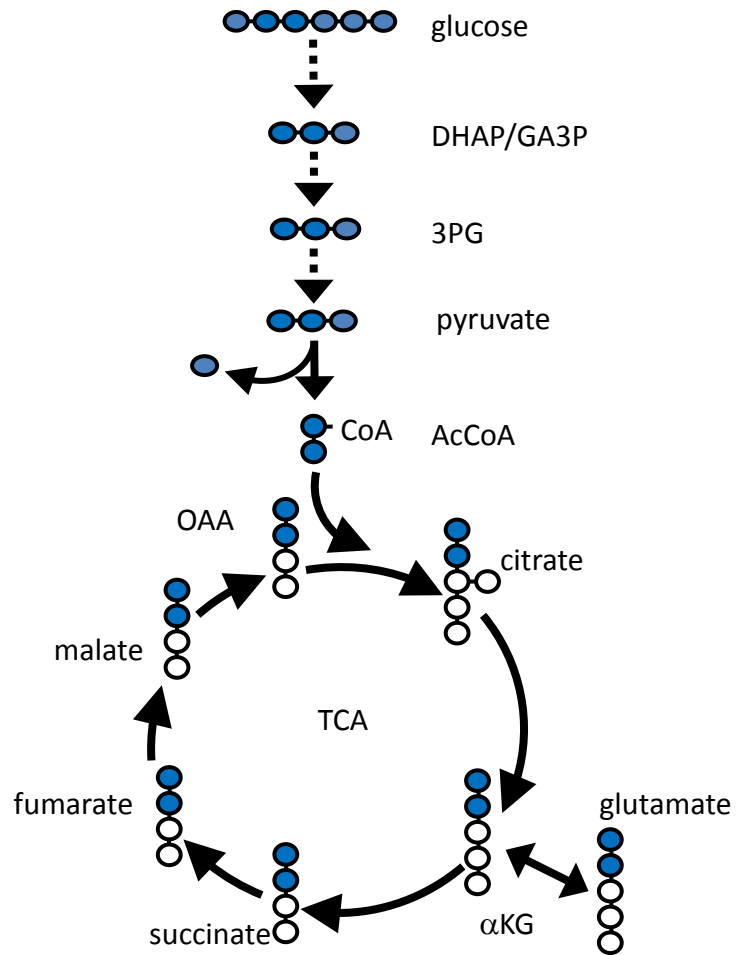

Figure S6

## Epithelial

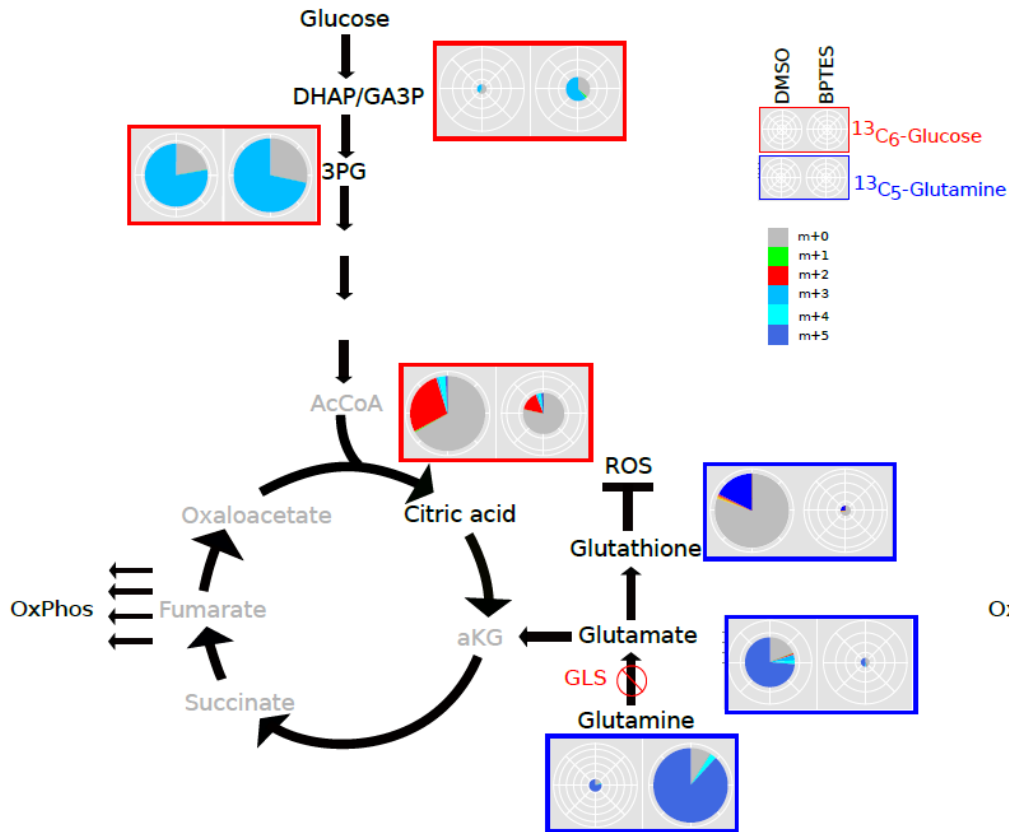

## Mesenchymal

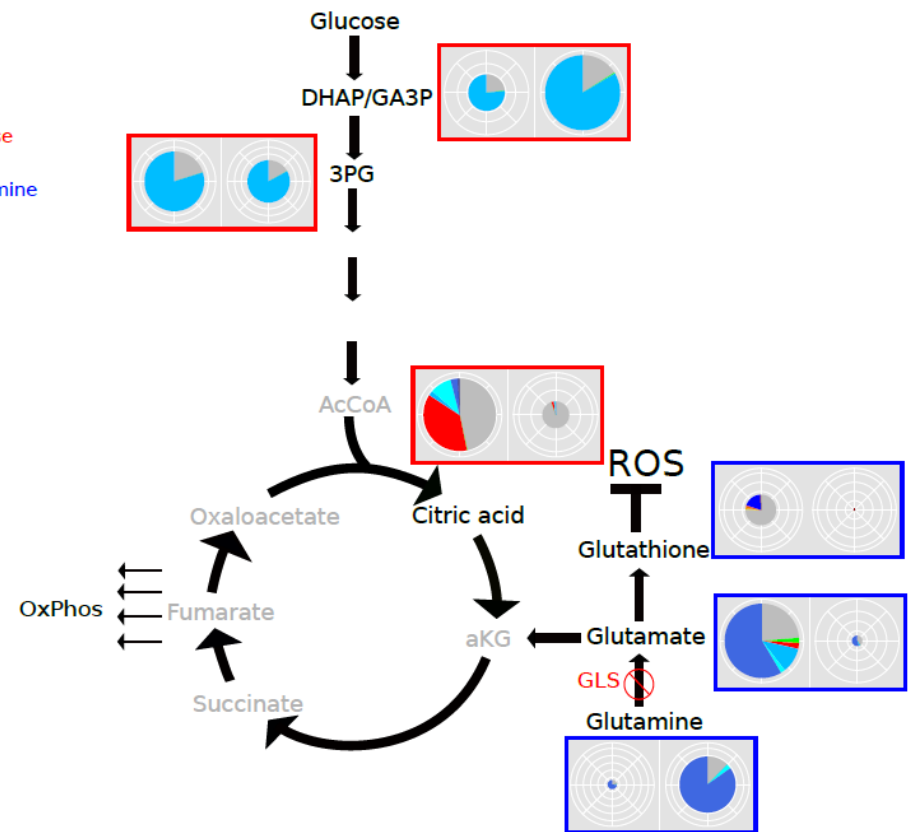

Figure S7

A

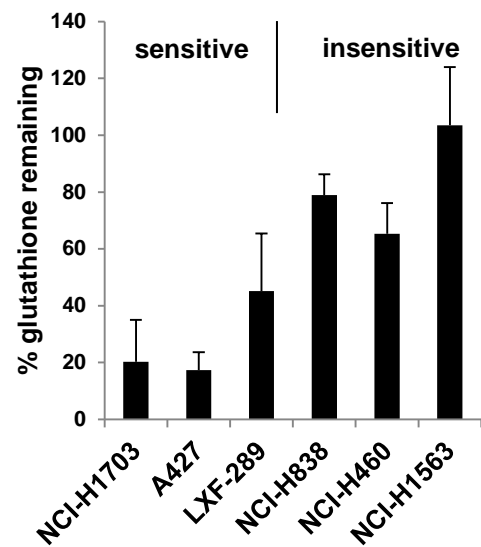

B

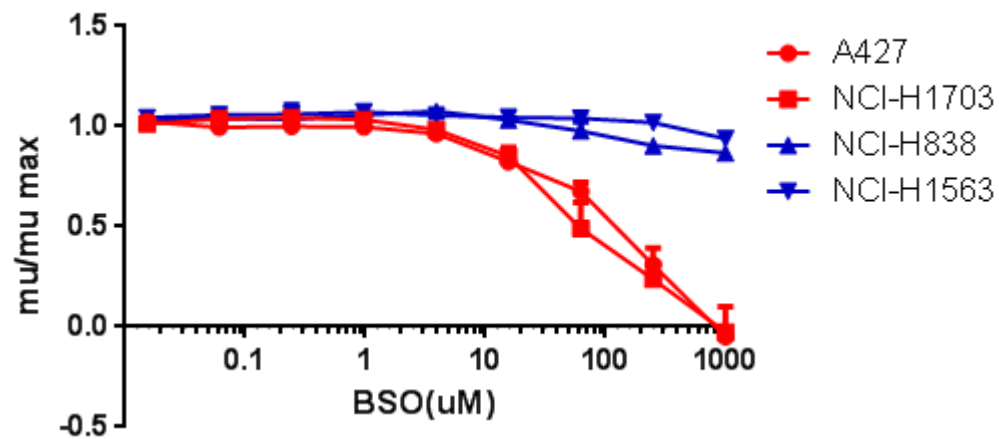

Figure S8



**A**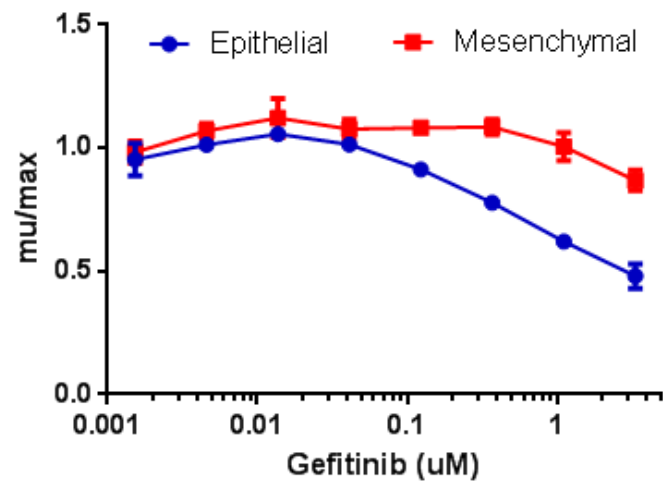**B**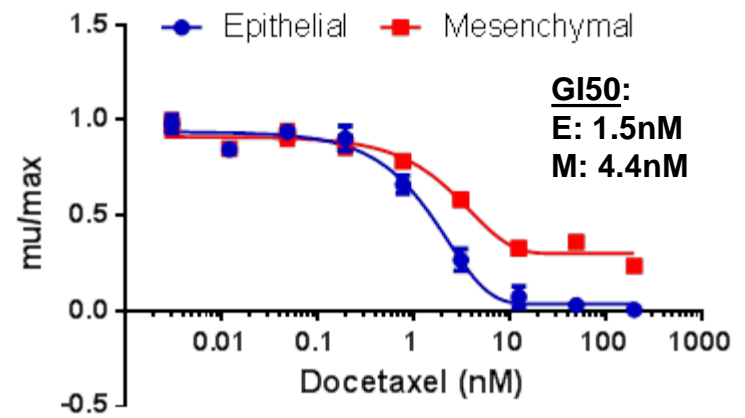

Figure S9

1 **Supplemental Figure Legends**

2

3 **Figure S1. Comparison of two different methods of viability measurement.** Equivalent  
4 A427, NCI-H1703, and NCI-H1563 cells were plated into 96-well plates and treated with DMSO  
5 or 8 $\mu$ M BPTES. Growth was measured at the indicated times by (A) CellTiter-Glo (CTG) or (B)  
6 Syto60 as indicated. *P* values at 72 hr timepoint comparing growth +/- BPTES by CTG or  
7 Syto60: CTG: A427 *P*=6.9x10<sup>-9</sup>, NCI-H1703 *P*=1.4x10<sup>-9</sup>, NCI-H1563 *P*=0.42; Syto60: A427  
8 *P*=1.1x10<sup>-7</sup>, NCI-H1703 *P*=1.2x10<sup>-9</sup>, NCI-H1563 *P*=0.002.

9

10 **Figure S2. Diagram highlighting contribution of glutamine and GLS1 activity to the**  
11 **generation of glutamate, aspartate, and TCA intermediates.** The five carbons of glutamine  
12 highlighted in red represent the fully labeled <sup>13</sup>C isotopomer, <sup>13</sup>C(5)-glutamine. These <sup>13</sup>C atoms  
13 can be tracked through the immediate downstream product of glutaminase activity to <sup>13</sup>C(5)-  
14 glutamate (boxed, right) and after multiple enzymatic steps to <sup>13</sup>C(4)-aspartate (boxed, left).

15

16 **Figure S3. Structures of BPTES and the inactive analogue, AGX-4769.**

17

18 **Figure S4. GLS1 KD and validation of GLS1 antibody in BPTES sensitive vs insensitive**  
19 **NSCLC lines.** The indicated NSCLC lines were transfected with either non-targeting siRNAs or  
20 siRNAs targeting total GLS1(KGA + GAC) or specifically the GAC isoform. (A) Western blot  
21 analysis demonstrating KD of GLS1; the different GLS1 isoforms, KGA and GAC, are indicated.  
22  $\beta$ -actin serves as a loading control. (B) Effects of GLS1 KD on growth as measured by CTG in a  
23 72hr proliferation assay. Results representative of 2 independent experiments.

1 **Figure S5. Quantitation of oxygen consumption rate (OCR).** OCR of NCI-H358 epithelial  
2 and mesenchymal lines at (A) baseline ( $P=0.04$ ), and (B) 2 ( $P=0.34$ ) and 20hrs ( $P=0.06$ ) post  
3 DMSO or  $8\mu\text{M}$  BPTES treatment. (C) Relative cell number as determined by Syto60 staining of  
4 cells at the end of the 20hr drug treatment (mean  $\pm$ -SD).(D) OCR of NCI-H358 epithelial and  
5 mesenchymal lines following treatment with increasing concentrations of FCCP.  $P=3.8\times 10^{-5}$   
6 comparing OCR at  $5\mu\text{M}$  FCCP. Data normalized to OCR at time zero (100%) and presented as  
7 mean values  $\pm$ -SEM.

8 **Figure S6. Diagram highlighting flow of carbon from glucose through glycolysis and one**  
9 **round into the TCA.** The six carbons of glucose highlighted in blue represent the fully labeled  
10  $^{13}\text{C}$  isotopomer  $^{13}\text{C}(6)$ -glucose. Two carbons from glucose get incorporated via Acetyl-CoA into  
11 citrate by combining with four carbons from oxaloacetate (OAA).

12 **Figure S7. Graphic summary of metabolic changes induced by BPTES in the epithelial and**  
13 **mesenchymal NCI-H358 cells.** Metabolite pool size (depicted by scale of pie circle size) and  
14 label distribution (depicted by colored pie pieces) is shown for selected metabolites (black font).  
15 Blue and red rectangle borders indicate metabolite labeling from  $^{13}\text{C}_5$ -Gln or  $^{13}\text{C}_6$ -Glc,  
16 respectively.  $^{13}\text{C}_5$ -Gln labeling demonstrates effective inhibition of Gln $\rightarrow$ Glu conversion by  
17 BPTES in both lines, though citrate pool sizes are reduced to lower levels selectively in the  
18 mesenchymal line.  $^{13}\text{C}$ -Glc labeling shows a dramatic reduction in Glc contribution to citrate  
19 pools upon BPTES treatment selectively in the mesenchymal line, which is accompanied by a  
20 block in flow from DHAP/GA3P to 3-PG (compare pie charts on right for DHAP and 3PG for  
21 the two lines).

1 **Figure S8. Decreases in intracellular glutathione levels upon GLS inhibition and**  
2 **dependence on glutathione biosynthesis mark sensitive lines.** (A) Intracellular glutathione  
3 levels remaining after 24hr treatment with 10 $\mu$ M BPTES in 6 NSCLC lines. Cell lines arranged  
4 in order of decreasing sensitivity from left to right (as determined from a 72hr proliferation assay  
5 carried out in parallel with the glutathione measurements). Results are plotted as average and  
6 standard deviation of 3 independent experiments. (B) The indicated cell lines (BPTES sensitive  
7 in red, insensitive in blue) were treated with BSO in a 72hr CTG assay. Results representative of  
8 2 independent experiments and plotted as mean +/-SD.

9 **Figure S9. Decreased sensitivity of mesenchymal NCI-H358 cells to EGFRi and docetaxel**  
10 **compared to epithelial line.** NCI-H358 epithelial and mesenchymal lines were treated in  
11 triplicate with (A) gefitinib or (B) docetaxel at the indicated concentrations for 72 hrs and cell  
12 growth assessed by CTG. Results plotted as average growth rates (+/-SD) compared to DMSO  
13 treated cells. The GI50 for docetaxel in the 2 lines is indicated.

1 **Supplemental Methods**

2 **GLS1 siRNA knockdown**

3 Cells were transfected with non- targeting pool (5'-UGGUUUACAUGUCGACUAA-3', 5'-  
4 UGGUUUACAUGUUGUGUGA-3', 5'-UGGUUUACAUGUUUUCUGA-3', 5'-  
5 UGGUUUACAUGUUUCCUA-3'), GAC (5'-GUAUAAAGGCAGUAGAUUAUU-3'), or  
6 KGA/GAC (5'-GCACAGACAUGGUUGGUAU-3') siRNA oligonucleotides (Dharmacon),  
7 using Lipofectamine RNAiMAX (Life Technologies) for a final concentration of 20nM. Cells  
8 were plated into a 10cm plate at 30-40% confluence and incubated overnight at 37°C, 5% CO<sub>2</sub> in  
9 RPMI1640 media containing 10% FBS. 18hrs post plating cells, siRNAs were diluted in  
10 OPTIMEM Reduced Serum Media (Life Technologies) and 15ul Lipofectamine RNAiMAX was  
11 diluted in 1.5mls in OPTIMEM Reduced Serum Media. siRNA and Lipofectamine mixtures  
12 were combined and allowed to incubate at room temperature for 10min (total volume =  
13 2.5ml/10cm plate). Media was removed from cells and washed with PBS. Transfection mixture  
14 was added to cells and incubated for 5hrs at 37°C, 5%CO<sub>2</sub>. Transfection mixture was removed  
15 from cells and replaced with fresh RPMI1640 media +10%FBS. ~40hr post transfection cells  
16 were harvested and plated for a 72hr proliferation assay. Protein extracts were harvested 5 days  
17 post-transfection.

18
